# Supplementary material
Source: Research Square preprint supplement (doi:10.21203/rs.3.rs-9559119/v1)

**Supplementary Figure 1: Molecular Docking of phyto-compounds against tick BSAP1 and RmAChE1**


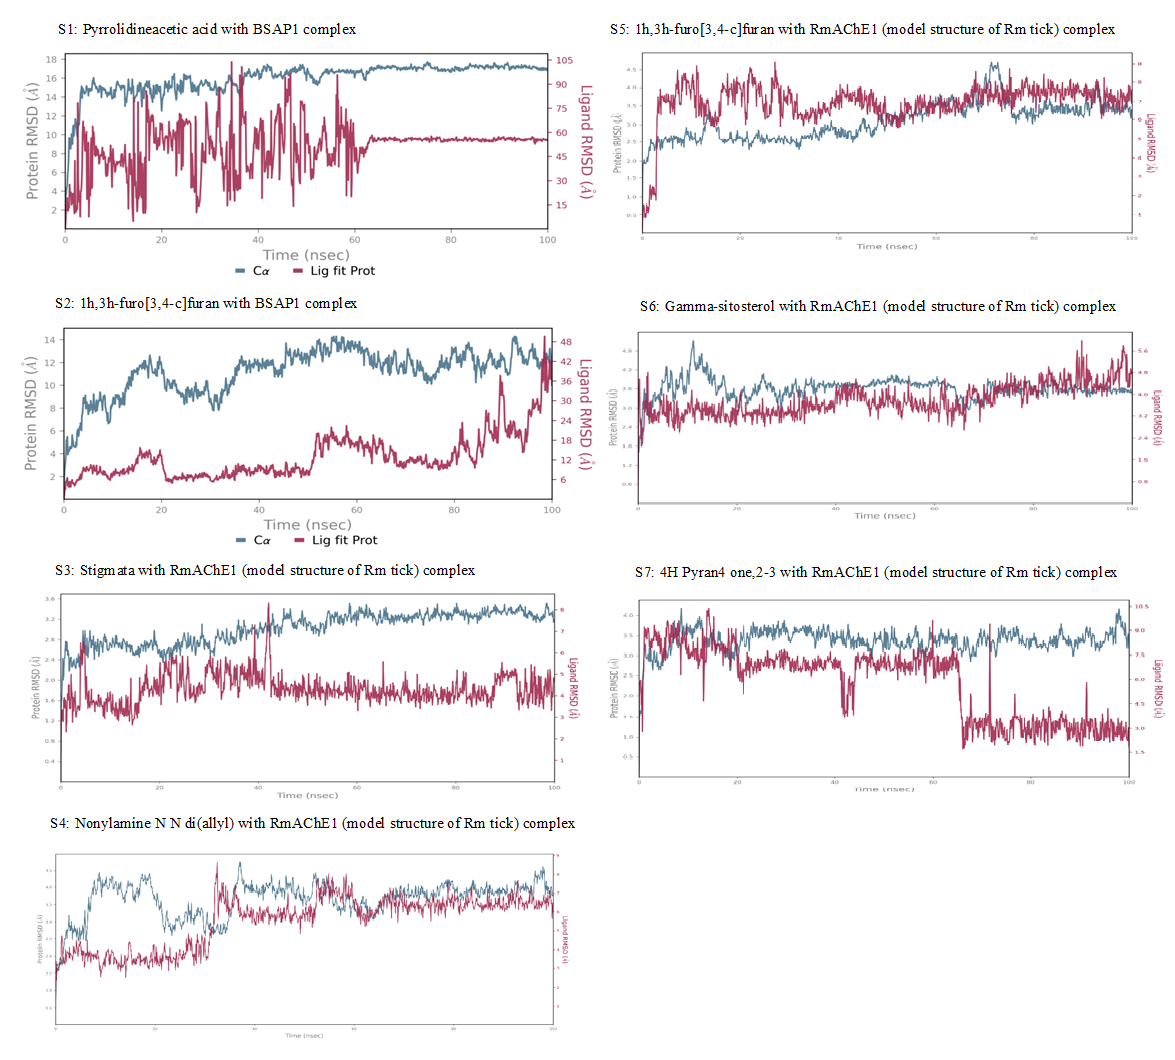


**Supplementary Figure 2: protein–ligand interaction of phyto-compounds against tick BSAP1 and RmAChE1**


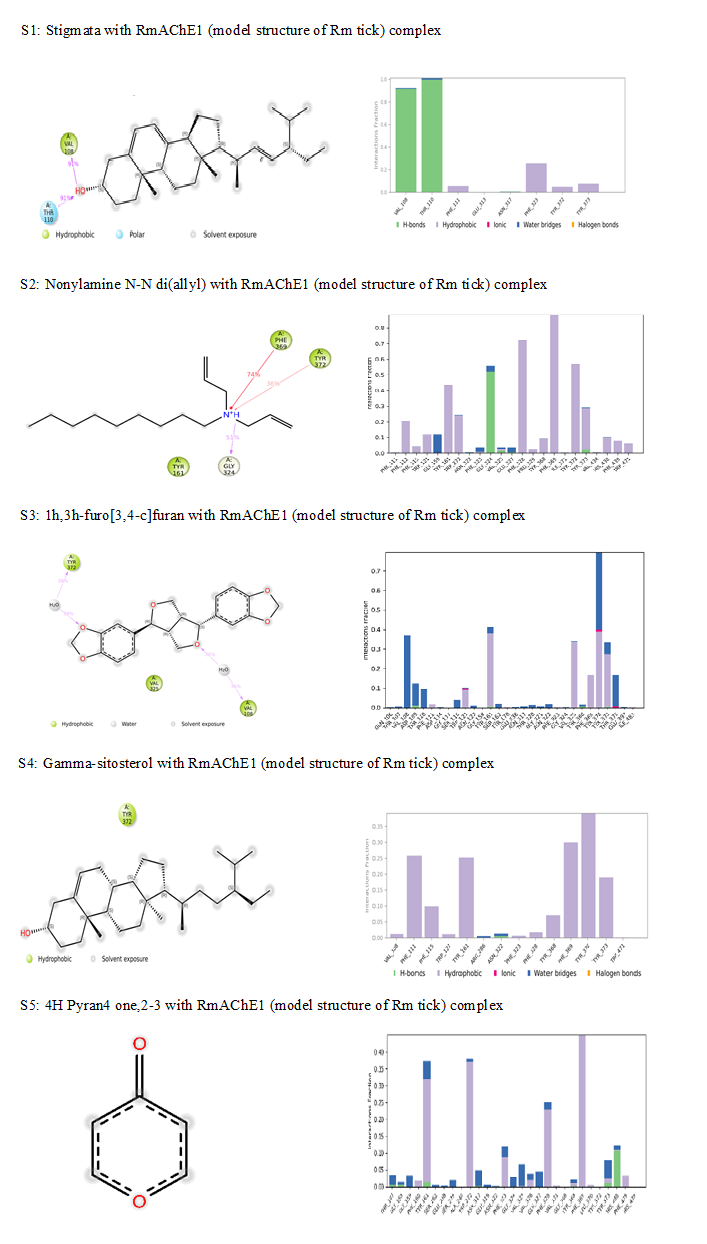

Supplement: Supplementary file 1 [file 0ec3dd787a24edb636862144.docx]
